# Supplementary material for: Insyght: navigating amongst abundant homologues, syntenies and gene functional annotations in bacteria, it's that symbol!
Source: Oxford University Press journal article supplement (doi:10.1093/nar/gku867), 2014-09-23
Supplement: gku867_Supplementary_Data.zip [file gku867_Supplementary_Data.zip]

Archive with 2 entries (2 files):
- nar-01151-met-n-2014-File007.pdf
- nar-01151-met-n-2014-File006.pdf
