# Supplementary material for: Insyght: navigating amongst abundant homologues, syntenies and gene functional annotations in bacteria, it's that symbol!
Source: Oxford University Press journal article supplement (doi:10.1093/nar/gku867), 2014-09-23
Supplement: gku867_Supplementary_Data.zip [file gku867_Supplementary_Data.zip › nar-01151-met-n-2014-File006.pdf]

**Filter genes by:**

Presence / absence homology

presence

of homologs in organism(s) :

Bacillus cereus strain  
G9842  
[taxonId=405531] x

Lactococcus lactis strain  
KF147  
[taxonId=684738] x

(... AND ...)

absence

of homologs in organism(s) :

Staphylococcus aureus  
strain ED98  
[taxonId=681288] x

AND/OR...

(...) AND (...)

function, biological process (keyword)

containing

ATP binding

(\* support POSIX regular  
expression)

AND/OR...

(... OR ...)

EC number

starting with

1.2.5

(\* support POSIX regular  
expression)

AND/OR...

New filter AND/OR...

Supporting Figure 1. The filter box. An unlimited number of filters of different types (genomic location, presence / absence of homologs, gene ids, function, biological process, product, cellular component, EC number, type of evidence) can be combined with the operators AND (intersection) or OR (union).

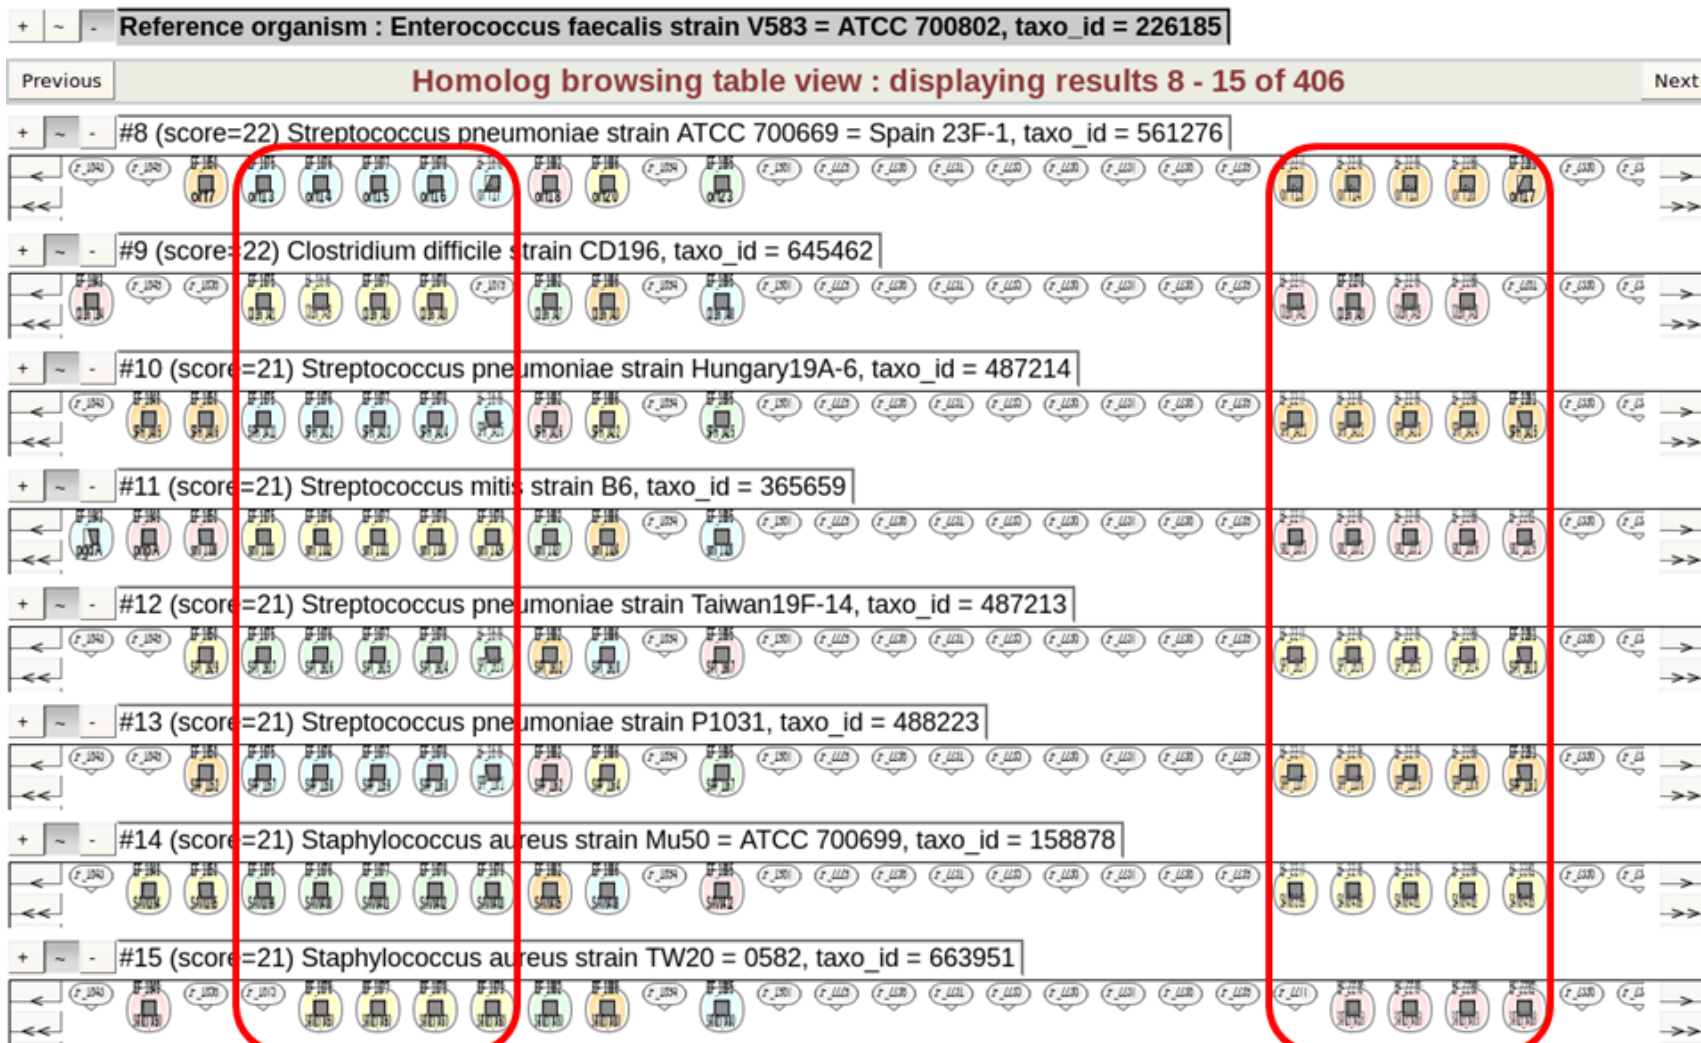

EF\_1875-EF\_1879

EF\_2277-EF\_2281

Supporting figure 2. Example of the homolog table view showing a subset of the dispensable genes set of *E. faecalis* V583 and their homologs among a few compared species. The two duplicated collinear syntenies EF\_1875-EF\_1879 and EF\_2277-EF\_2281 are highlighted in red. They are conserved in our dataset among twenty-four firmicutes, all of which are pathogenic to human (see Supporting Table 4).
